# Supplementary material
Source: publisher figshare collection journal article supplement (https://tandf.figshare.com/articles/dataset/_/1310466)
Supplement: Supplementary file 1 [file 4]

## CfWSCP1

```

1  ATGTCTCCAAAACAACCACTACCTCCCTCGCTCTCCTCGCAATTACTCTTGCTGTAACTGTCTCCGCCCATGCCCACTGCCCTGCT
   M S P K T T T T S L A L L A I T L A V T L S S A H A H C P A 30

91  TCAACGATCCCTGGGATCTTGAAGTATTATGGGTTACCGCCCTCGATTTTCCCTGGTAATGTGCAGAGCTTCAGCTGCGATCTTGTC AAC
   S T I P G I L K Y Y G L P P S I F P G N V Q S F S C D L V N 60

181  AAAAATCCATCAGGTTAACGATTAACCTTGCTTGGTGAATGTACCGTGGTTAACGAAGTGGGTGCTATTCAAATGTACTCAAGTGCTCA
   K N S I R L T I N L L G E C T V V N E L G A I Q N V L K C S 90

271  GAAAAGATATCGGCGGTCTTATCACATAACAACTGACTGAAGTTAAGGGAGTGAAGTGTCCAACCTCTATGTTAAGCTTCTCCCTGGCTT
   E K I S A V L S H N K L T E V K G V T V Q L Y V K L L P W L 120

361  GATGCTGCACCATTTGGTCCCCTCATGACCATAACCGGTGCCGAAGCCTCTCACGGACCTCTTAAGTTAAAGTTGTTTAAAGTTATTTCT
   D A A P F G P L M T I T G A E A S H G P L N L K L F K F I S 150

451  GACCAAGGTGAAAGTCCAGCCTTCCCTACATATTATTCCTAATCAAGCCCCAAATGTACCCATCTTGCTTTCTATGACACCGTTGTT
   D Q G E S P A F P Y I L F P N Q A P K C T H L A F Y D T V V 180

541  GCCAACACAAACACCAATCTTCCTTTTAATCCTCTTCTTGTGCTTAA
   A N T N T N L P F N P L L V A * 195

```

## CfWSCP2

```

1  ATGTCTCCAAAACAACCACTACCTCCCTCGCTCTCCTCGCAATTACTCTTGCTCTAGCACTGTCTCCGCCCATGCCCACTGCCCTGCT
   M S P K P T T T S F A L L A I T L A L A L S S A H A H C P A 30

91  TCAACAATCCCTGATATCTTGAAGTATTATGGGTTACCGCCCTCGATTTTCCCTGGTAATGGTGTGAGCTTCAGCTGCGGTCTGTCAAC
   S T I P D I L K Y Y G L P P S I F P G N G V S F S C G P V N 60

181  CAAAATCCATCAGGTTAAATATTAACCTTGCGTGGTAAATGTACCGTGGTTAACGAAGTGGGTGCTATTCAAATGTACTCAAGTGCTCT
   Q N S I R L N I N L R G K C T V V N E L G A I Q N V L K C S 90

271  GAAAAGATATCGGCGAGTCTTATCACATGACAACTGAGCGAAGTTAAGGGAGTGAAGTGTCCAACCTCTATGTTAAGCTTCTCCCTGGCTC
   E K I S A V L S H D K L S E V K G V T V Q L Y V K L L P W L 120

361  GATGCAGCACCATTTGGTCTCTCATGACCATAACCGGTGCCGAAGCCTCTTACGCACCTTTTAAGTTAAAGTTGTTTATGTTATCTCT
   D A A P F G P L M T I T G A E A S Y A P F N L K L F M F I S 150

451  GACAAAGGTAACAGTCCAGCCTTCCCTACTTGTATTCCCAATCAAGCCCCAAATGTGCAATCTTGCTTTGTATGACACCTTCGTT
   D K G N S P A F P Y L L F P N Q A P K C A N L A L Y D T F V 180

541  GCCAACACCAACCGGAGGACATTCTTTTAATCCTCTTCTCGTTGCTTAA
   A N T N P E D I P F N P L L V A * 196

```

**Fig. S1** Nucleotide and deduced amino acid sequences of the open reading frame of CfWSCP1 and CfWSCP2. Nucleotides and amino acid residues are numbered on the left and right sides of the sequences, respectively.
