# Supplementary material
Source: publisher figshare collection journal article supplement (https://tandf.figshare.com/articles/dataset/_/1310466)
Supplement: Supplementary file 2 [file 4]

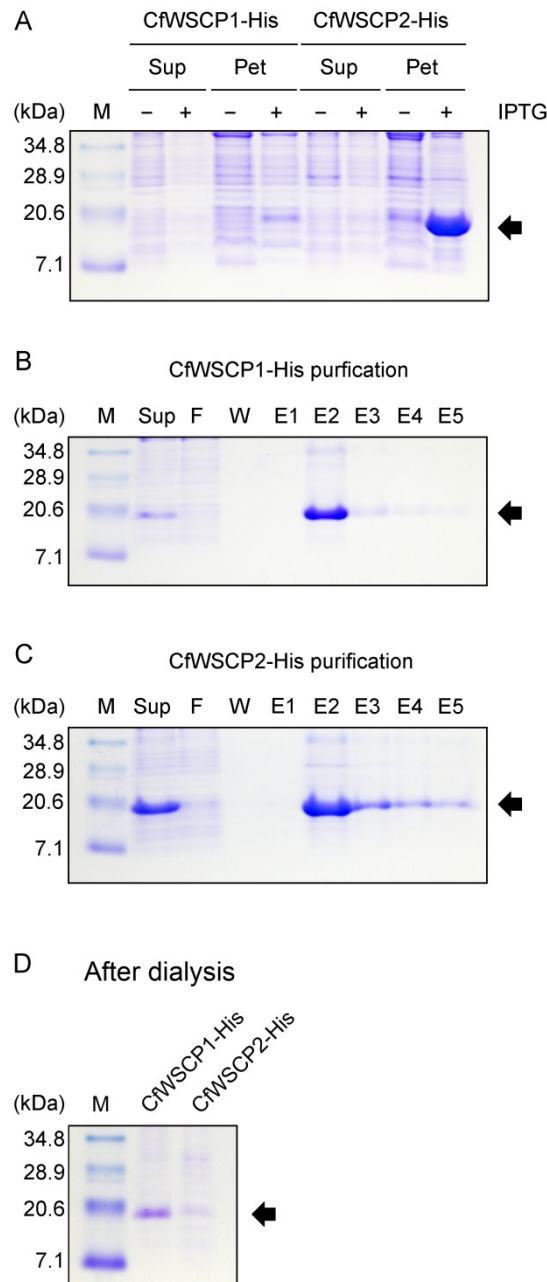

**Fig. S3** SDS-PAGE profiles of the experimental steps in obtaining refolded CfWSCP1-His and CfWSCP2-His. Black arrows indicate the CfWSCPs. (A) Induction of CfWSCP1-His and CfWSCP2-His expression in *E. coli* and subcellular fractionation. Fractions obtained from IPTG-induced (+), or non-induced (-) *E. coli*. Supernatant (Sup) and pellet (Pet) fractions of sonicated *E. coli* were separated by 20% SDS-PAGE. Purifications of the solubilized CfWSCP1-His (B) and CfWSCP2-His (C) by  $\text{Ni}^{2+}$ -chelating affinity chromatography. Shown are the supernatant fractions before chromatography (Sup), the flow-through fraction; (F), the wash fraction (W) and a series of eluted fractions E1–5. (D) SDS-PAGE profile of dialyzed, purified CfWSCP1-His and CfWSCP2-His.
