# Supplementary material
Source: publisher figshare collection journal article supplement (https://tandf.figshare.com/articles/dataset/_/1310466)
Supplement: Supplementary file 3 [file 4]

Archive with 3 entries (3 files):
- Figure S1.pdf
- Figure S3.pdf
- Figure S2.pdf
