# Supplementary material
Source: publisher figshare collection journal article supplement (https://tandf.figshare.com/articles/dataset/_/1310466)
Supplement: Supplementary file 3 [file 4 › Figure S2.pdf]

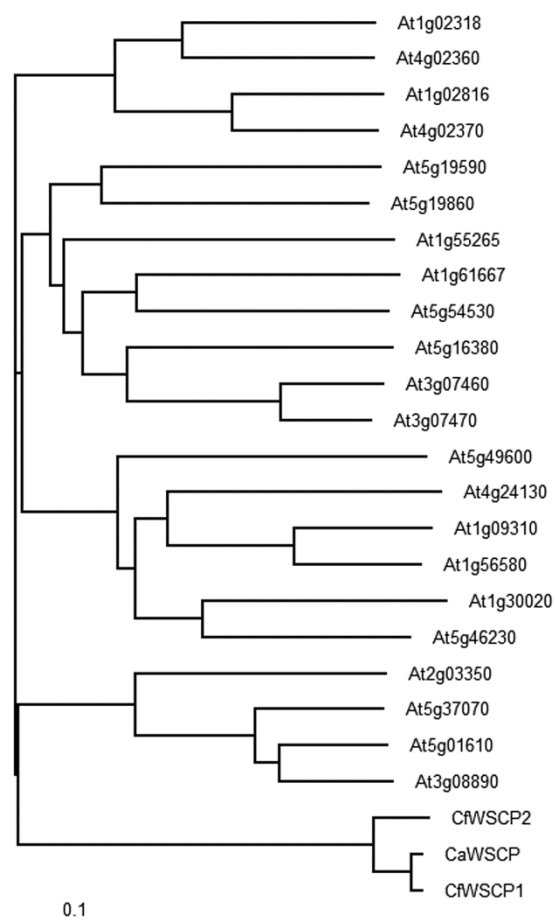

**Fig. S2** Phylogenetic tree of *CfWSCP1*, *CfWSCP2*, *CaWSCP*, and *AtDUF538s*. Branch lengths are proportional to genetic distances calculated by the neighbor-joining method.
